# Supplementary material for: Degradation of Hydroquinone Coupled with Energy Generation through Microbial Fuel Cells Energized by Organic Waste
Source: MDPI journal article supplement (doi:10.3390/pr10102099), 2022-10-17
Supplement: s1 [file s1]

## Supplementary File

### **Degradation of hydroquinone coupled with energy generation through microbial fuel cell energized by organic waste**

Tasnim Aisya Mahmuelee Torlaema<sup>1</sup>, Mohamad Nasir Mohamad Ibrahim<sup>1\*</sup>, Akil Ahmad<sup>2\*</sup>, Claudia Guerrero-Barajas<sup>3</sup>, Mohammed B. Alshammari<sup>2</sup>, Sang-Eun Oh<sup>4</sup> and Fida Hussain<sup>5\*</sup>

<sup>1</sup>Materials Technology Research Group (MaTRec), School of Chemical Sciences, Universiti Sains Malaysia, 11800 Minden, Penang, Malaysia

<sup>2</sup>Chemistry Department, College of Sciences and Humanities, Prince Sattam bin Abdulaziz University, Al-Kharj 11942, Saudi Arabia

<sup>3</sup>Laboratorio de Biotecnología Ambiental, Departamento de Bioprocesos, Unidad Profesional Interdisciplinaria de Biotecnología, Instituto Politécnico Nacional, Av. Acueducto s/n, Col. Barrio La Laguna Ticomán, 07340 Mexico City, Mexico

<sup>4</sup>Department of Biological Environment, Kangwon National University, Chuncheon-si, South Korea

<sup>5</sup>Research Institute for Advanced Industrial Technology, College of Science and Technology, Korea University, Sejong 30019, South Korea

\* Correspondence: \*Corresponding Authors: Mohamad Nasir Mohamad Ibrahim (mnmm@usm.my) and Akil Ahmad (aj.ahmad@psau.edu.sa); Fida Hussain ([hussainfida@korea.ac.kr](mailto:hussainfida@korea.ac.kr)).

**Table S1.** Comparative profile of different organic substrates used in MFC.

| Natural<br>organic<br>substrate | Electrode material     |                | Inoculum<br>source                | Current<br>density          | Reference |
|---------------------------------|------------------------|----------------|-----------------------------------|-----------------------------|-----------|
|                                 | Anode                  | Cathode        |                                   |                             |           |
| Sweet potatoes                  | GO-PANI                | Graphite rods  | Synthetic wastewater              | 87.71 mA/m <sup>2</sup>     | [1]       |
| Oil palm trunk sap              | Lg-GO                  | Graphite rods  | Mixed microbial culture           | 57.01 mA/m <sup>2</sup>     | [2]       |
| Landfill leachate               | Carbon veil            | Platinum wirer | Leachate and sludge               | 3.24±0.17 mA/m <sup>2</sup> | [3]       |
| Beer brewery wastewater         | Carbon fiber           | Graphite rods  | Anaerobic mixed consortia         | 79 mA/m <sup>2</sup>        | [4]       |
| Macroalgae, Ulva lactuca        | Graphite fiber         | Graphite fiber | Mixed culture                     | 0.76 mA/m <sup>2</sup>      | [5]       |
| Oil palm trunk sap              | Lg-GO/TiO <sub>2</sub> | Graphite rods  | Mixed microbial culture           | 70.17 mA/m <sup>2</sup>     | [2]       |
| Malt extract, yeast extract     | Graphite rods          | Graphite plate | Pure culture of <i>E. cloacae</i> | 27.6 mA/m <sup>2</sup>      | [6]       |

|                                     |                                                       |                  |                   |                                        |                              |                         |
|-------------------------------------|-------------------------------------------------------|------------------|-------------------|----------------------------------------|------------------------------|-------------------------|
| and glucose                         |                                                       |                  |                   |                                        |                              |                         |
| Glucose                             | Graphene/<br>ethylenedioxythiophene)/<br>carbon paper | Poly(3,4-        | Graphite<br>plate | <i>Escherichia coli</i>                | 3.59 mA/m <sup>2</sup>       | [7]                     |
| Brewery<br>wastewater               | Carbon cloth                                          |                  | Carbon<br>cloth   | Full strength<br>brewery<br>wastewater | 0.76 mA/m <sup>2</sup>       | [8]                     |
| Chocolate<br>industry<br>wastewater | Graphite rods                                         |                  | Graphite<br>rods  | Activated<br>sludge                    | 4.1 mA/m <sup>2</sup>        | [9]                     |
| Sweet<br>potatoes                   | GO                                                    |                  | Graphite<br>rods  | Synthetic<br>wastewater                | 24.56mA/m <sup>2</sup>       | [1]                     |
| Acetate                             | Carbon<br>cloth                                       | nanotubes/carbon | -                 | Mixed<br>microbial<br>culture          | 65 mA/m <sup>2</sup>         | [10]                    |
| Rotten rice                         | Graphite rods                                         |                  | Graphite<br>rods  | Mixed<br>microbial<br>culture          | 123.684<br>mA/m <sup>2</sup> | <b>Present<br/>work</b> |

## References

1. Yaqoob, A.A.; Mohamad Ibrahim, M.N.; Umar, K.; Bhawani, S.A.; Khan, A.; Asiri, A.M.; Khan, M.R.; Azam, M.; AlAmmari, A.M. Cellulose derived graphene/polyaniline nanocomposite anode for energy generation and bioremediation of toxic metals via benthic microbial fuel cells. *Polymers* **2020**, *13*, 135.

2. Yaqoob, A.A.; Ibrahim, M.N.M.; Rodríguez-Couto, S.; Ahmad, A. Preparation, characterization, and application of modified carbonized lignin as an anode for sustainable microbial fuel cell. *Process Safety and Environmental Protection* **2021**, *155*, 49-60.
3. Greenman, J.; Gálvez, A.; Giusti, L.; Ieropoulos, I. Electricity from landfill leachate using microbial fuel cells: comparison with a biological aerated filter. *Enzyme and Microbial Technology* **2009**, *44*, 112-119.
4. Wen, Q.; Wu, Y.; Cao, D.; Zhao, L.; Sun, Q. Electricity generation and modeling of microbial fuel cell from continuous beer brewery wastewater. *Bioresource technology* **2009**, *100*, 4171-4175.
5. Velasquez-Orta, S.B.; Curtis, T.P.; Logan, B.E. Energy from algae using microbial fuel cells. *Biotechnology and bioengineering* **2009**, *103*, 1068-1076.
6. Mohan, Y.; Kumar, S.M.M.; Das, D. Electricity generation using microbial fuel cells. *International Journal of Hydrogen Energy* **2008**, *33*, 423-426.
7. Wang, Y.; Zhao, C.-e.; Sun, D.; Zhang, J.-R.; Zhu, J.-J. A graphene/poly (3, 4-ethylenedioxythiophene) hybrid as an anode for high-performance microbial fuel cells. *ChemPlusChem* **2013**, *78*, 823.
8. Feng, Y.; Wang, X.; Logan, B.E.; Lee, H. Brewery wastewater treatment using air-cathode microbial fuel cells. *Applied microbiology and biotechnology* **2008**, *78*, 873-880.
9. Patil, S.A.; Surakasi, V.P.; Koul, S.; Ijmulwar, S.; Vivek, A.; Shouche, Y.; Kapadnis, B. Electricity generation using chocolate industry wastewater and its treatment in activated sludge based microbial fuel cell and analysis of developed microbial community in the anode chamber. *Bioresource technology* **2009**, *100*, 5132-5139.
10. Tsai, H.-Y.; Wu, C.-C.; Lee, C.-Y.; Shih, E.P. Microbial fuel cell performance of multiwall carbon nanotubes on carbon cloth as electrodes. *Journal of Power Sources* **2009**, *194*, 199-205.
